# Supplementary material for: Combination of Dichloroacetate and Atorvastatin Regulates Excessive Proliferation and Oxidative Stress in Pulmonary Arterial Hypertension Development via p38 Signaling
Source: Hindawi journal article supplement (doi:10.1155/2020/6973636), 2020-06-12

Supplementary Figure 1

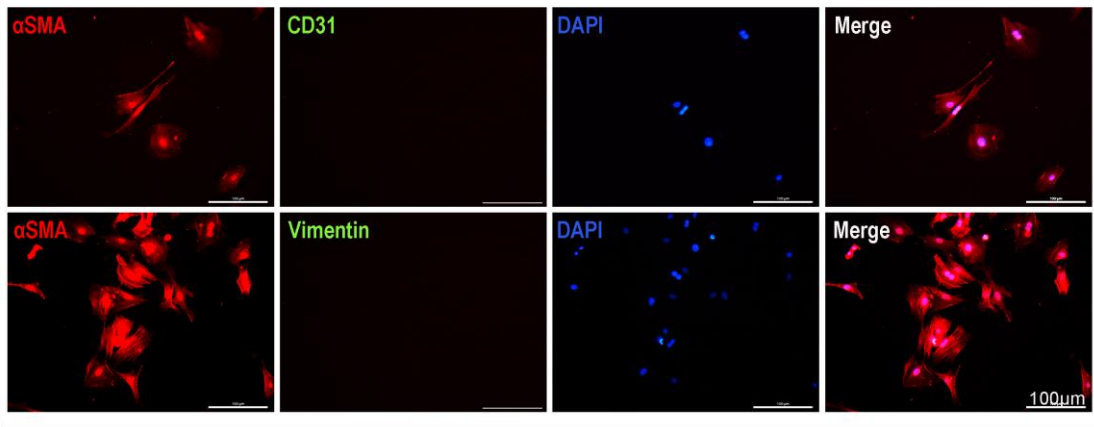

Supplementary Figure 2

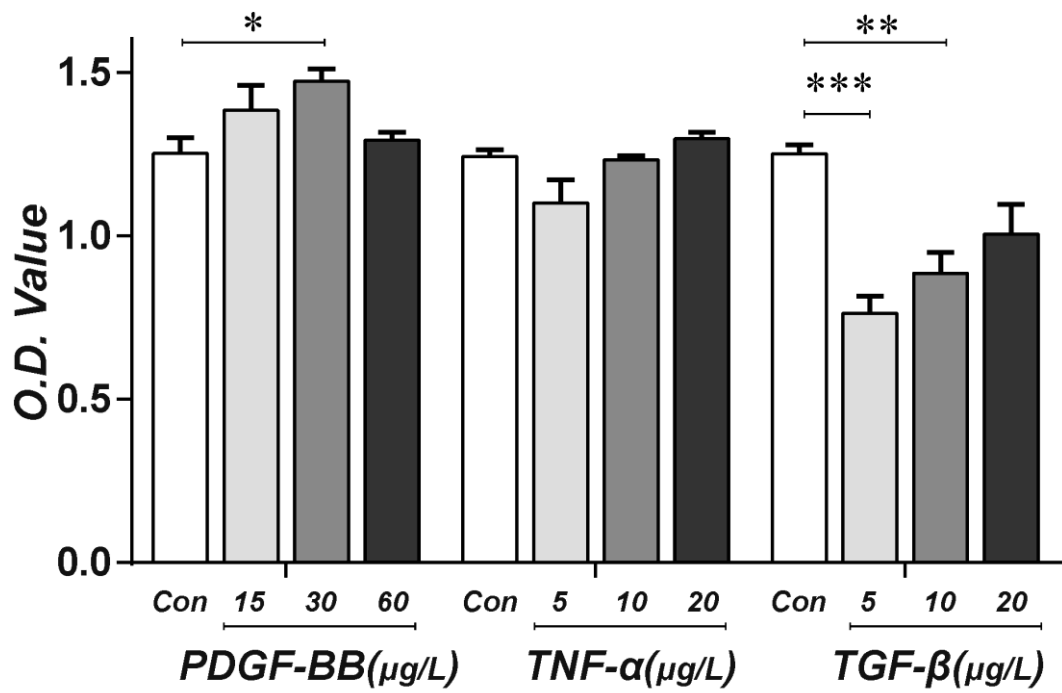

Supplement: f1 [file 6973636.f1.pdf]
